# Supplementary material for: Transition metal complex directed lead bromides with tunable structures and visible light driven photocatalytic properties
Source: Royal Society of Chemistry journal article supplement (doi:10.1039/c6dt03601e), 2016-01-01
Supplement: c6dt03601e1.pdf [file c6dt03601e1.pdf]

# Transition Metal Complex Directed Lead Bromides with Tunable Structures and Visible Light Driven Photocatalytic Properties

Xiao-Wu Lei,\* Cheng-Yang Yue,\* Jun-Chao Wei, Rui-Qing Li, Yan Li, Fu-Qi Mi, Fan Wu

**Table S1.** Selected bond lengths (Å) for compound **1**.

|               |           |               |           |
|---------------|-----------|---------------|-----------|
| Pb(1)-Br(8)#1 | 3.039(2)  | Pb(3)-Br(7)#2 | 2.891(2)  |
| Pb(1)-Br(8)   | 3.039(2)  | Pb(3)-Br(3)   | 3.026(2)  |
| Pb(1)-Br(8)#2 | 3.039(2)  | Pb(3)-Br(5)#1 | 3.055(2)  |
| Pb(1)-Br(5)#2 | 3.055(2)  | Pb(3)-Br(4)   | 3.092(2)  |
| Pb(1)-Br(5)#1 | 3.055(2)  | Pb(3)-Br(8)   | 3.104(2)  |
| Pb(1)-Br(5)   | 3.055(2)  | Pb(3)-Br(2)   | 3.162(2)  |
| Pb(2)-Br(6)   | 2.823(2)  | Co(1)-N(2)    | 1.986(15) |
| Pb(2)-Br(1)   | 2.869(2)  | Co(1)-N(1)    | 2.033(18) |
| Pb(2)-Br(4)   | 2.903(2)  | Co(1)-Br(3)   | 2.394(3)  |
| Pb(2)-Br(7)   | 3.174(2)  | Co(1)-Br(2)   | 2.457(3)  |
| Co(3)-N(6)    | 2.051(11) | Co(2)-N(3)#1  | 2.068(15) |
| Co(3)-N(6)#1  | 2.051(11) | Co(2)-N(3)#2  | 2.068(15) |
| Co(3)-N(6)#2  | 2.051(11) | Co(2)-N(3)    | 2.068(15) |
| Co(3)-N(5)    | 2.155(15) | Co(2)-N(4)    | 2.078(13) |
| Co(3)-N(5)#1  | 2.155(15) | Co(2)-N(4)#2  | 2.078(13) |
| Co(3)-N(5)#2  | 2.155(15) | Co(2)-N(4)#1  | 2.078(13) |

Symmetry transformations used to generate equivalent atoms: #1  $-y+1, x-y, z$ ; #2  $-x+y+1, -x+1, z$ .

**Table S2.** Selected bond lengths (Å) for compound **2**.

|               |           |             |            |
|---------------|-----------|-------------|------------|
| Pb(1)-Br(2)   | 2.9504(8) | Co(1)-N(2)  | 1.971(6)   |
| Pb(1)-Br(1)   | 2.9564(8) | Co(1)-N(3)  | 1.982(5)   |
| Pb(1)-Br(2)#1 | 3.0027(8) | Co(1)-N(1)  | 2.073(6)   |
| Pb(1)-Br(3)   | 3.0441(8) | Co(1)-N(4)  | 2.126(6)   |
| Pb(1)-Br(3)#1 | 3.1097(8) | Co(1)-Br(4) | 2.4191(12) |
| Pb(1)-Br(1)#2 | 3.1330(9) |             |            |

Symmetry transformations used to generate equivalent atoms: #1  $-x+3/2, y-1/2, z$ ; #2  $-x+3/2, y+1/2, z$ .

**Table S3.** Selected bond lengths (Å) for compound **3**.

|               |            |                |            |
|---------------|------------|----------------|------------|
| Pb(1)-Br(2)   | 2.8082(13) | Pb(3)-Br(9)    | 2.9661(10) |
| Pb(1)-Br(7)   | 3.0031(12) | Pb(3)-Br(9)#1  | 2.9661(10) |
| Pb(1)-Br(8)   | 3.0221(12) | Pb(3)-Br(10)   | 2.9952(11) |
| Pb(1)-Br(10)  | 3.0912(12) | Pb(3)-Br(10)#1 | 2.9952(11) |
| Pb(1)-Br(4)   | 3.1072(12) | Pb(3)-Br(7)#1  | 3.0620(13) |
| Pb(2)-Br(12)  | 2.9530(11) | Pb(3)-Br(7)    | 3.0620(13) |
| Pb(2)-Br(4)#1 | 2.9635(12) | Pb(4)-Br(11)#2 | 2.899(12)  |
| Pb(2)-Br(9)   | 3.0005(11) | Pb(4)-Br(1)    | 2.959(12)  |
| Pb(2)-Br(3)   | 3.0283(14) | Pb(4)-Br(5)#2  | 3.010(16)  |
| Pb(2)-Br(11)  | 3.0906(11) | Pb(4)-Br(11)   | 3.079(12)  |
| Pb(2)-Br(8)#1 | 3.0914(13) | Pb(4)-Br(5)    | 3.086(15)  |
| Co(1)-N(1)    | 2.075(7)   | Pb(4)-Br(1)#2  | 3.167(12)  |
| Co(1)-N(4)    | 2.080(7)   | Pb(5)-Br(6)    | 2.8825(12) |
| Co(1)-N(6)    | 2.084(7)   | Pb(5)-Br(12)   | 3.0081(12) |
| Co(1)-N(3)    | 2.089(7)   | Pb(5)-Br(1)    | 3.0475(15) |
| Co(1)-N(9)    | 2.096(7)   | Pb(5)-Br(5)    | 3.0564(14) |
| Co(1)-N(5)    | 2.099(7)   | Pb(5)-Br(3)    | 3.1222(14) |
| Co(2)-N(12)   | 2.043(9)   | Pb(5)-Br(11)   | 3.2223(11) |
| Co(2)-N(2)    | 2.097(7)   | Co(2)-N(7)     | 2.103(7)   |
| Co(2)-N(8)    | 2.098(8)   | Co(2)-N(10)    | 2.103(8)   |
|               |            | Co(2)-N(11)    | 2.109(9)   |

Symmetry transformations used to generate equivalent atoms: #1  $-x, -y+1, -z$ ; #2  $-x, -y+1, -z+1$ .

**Table S4.** Selected bond lengths (Å) for compound 4.

|               |            |                |            |
|---------------|------------|----------------|------------|
| Pb(1)-Br(5)   | 2.8081(11) | Pb(3)-Br(10)   | 2.8662(11) |
| Pb(1)-Br(4)   | 3.0019(11) | Pb(3)-Br(6)    | 3.0079(10) |
| Pb(1)-Br(1)   | 3.0844(10) | Pb(3)-Br(11)   | 3.0782(12) |
| Pb(1)-Br(2)   | 3.0930(11) | Pb(3)-Br(9)    | 3.1246(11) |
| Pb(1)-Br(3)   | 3.1679(10) | Pb(3)-Br(12)   | 3.1356(11) |
| Pb(2)-Br(6)   | 2.9541(9)  | Pb(3)-Br(7)    | 3.2258(10) |
| Pb(2)-Br(8)   | 2.9891(10) | Pb(4)-Br(7)#1  | 2.9953(9)  |
| Pb(2)-Br(3)   | 3.0317(10) | Pb(4)-Br(7)    | 2.9953(9)  |
| Pb(2)-Br(7)   | 3.1080(9)  | Pb(4)-Br(11)   | 3.0580(11) |
| Pb(2)-Br(9)   | 3.1178(11) | Pb(4)-Br(11)#1 | 3.0580(11) |
| Pb(2)-Br(1)   | 3.1209(11) | Pb(4)-Br(12)#1 | 3.1493(12) |
| Pb(5)-Br(8)   | 2.9609(9)  | Pb(4)-Br(12)   | 3.1493(12) |
| Pb(5)-Br(8)#2 | 2.9609(9)  | Pb(5)-Br(2)#2  | 2.9958(10) |
| Pb(5)-Br(2)   | 2.9958(10) | Pb(5)-Br(4)#2  | 3.0662(12) |
| Ni-N(1)       | 2.060(7)   | Pb(5)-Br(4)    | 3.0662(12) |
| Ni-N(4)       | 2.090(6)   | Ni(2)-N(12)    | 2.084(6)   |
| Ni-N(6)       | 2.102(6)   | Ni(2)-N(10)    | 2.091(6)   |
| Ni-N(5)       | 2.100(6)   | Ni(2)-N(7)     | 2.095(7)   |
| Ni-N(3)       | 2.107(6)   | Ni(2)-N(11)    | 2.091(6)   |
| Ni-N(2)       | 2.124(7)   | Ni(2)-N(8)     | 2.097(6)   |
|               |            | Ni(2)-N(9)     | 2.101(6)   |

Symmetry transformations used to generate equivalent atoms: #1 -x+1, -y+1, -z-1; #2 -x+1, -y+1, -z.

**Table S5.** Selected bond lengths (Å) for compound **5**.

|             |            |               |            |
|-------------|------------|---------------|------------|
| Pb(1)-Br(8) | 2.9247(18) | Pb(3)-Br(7)   | 2.8332(19) |
| Pb(1)-Br(9) | 2.9589(18) | Pb(3)-Br(9)#1 | 3.0007(17) |
| Pb(1)-Br(4) | 3.040(2)   | Pb(3)-Br(3)   | 3.050(2)   |
| Pb(1)-Br(6) | 3.0537(18) | Pb(3)-Br(8)#2 | 3.0701(18) |
| Pb(1)-Br(5) | 3.1414(19) | Pb(3)-Br(6)   | 3.1393(18) |
| Pb(1)-Br(2) | 3.177(2)   | Pb(3)-Br(4)#1 | 3.320(2)   |
| Pb(2)-Br(2) | 2.862(2)   | Co(1)-N(4)    | 1.927(11)  |
| Pb(2)-Br(1) | 2.888(2)   | Co(1)-N(2)    | 1.928(12)  |
| Pb(2)-Br(5) | 3.0050(18) | Co(1)-N(1)    | 1.937(11)  |
| Pb(2)-Br(3) | 3.0739(19) | Co(1)-N(3)    | 1.938(11)  |
| Pb(2)-Br(6) | 3.0795(18) | Co(1)-N(6)    | 1.939(11)  |
|             |            | Co(1)-N(5)    | 1.941(12)  |

Symmetry transformations used to generate equivalent atoms: #1  $x-1, y, z$ ; #2  $-x-1, -y, -z$ .

**Table S6.** Selected bond lengths (Å) for compound **6**.

|               |            |               |           |
|---------------|------------|---------------|-----------|
| Pb(1)-Br(10)  | 2.9128(8)  | Pb(4)-Br(12)  | 2.8500(8) |
| Pb(1)-Br(6)   | 2.9847(8)  | Pb(4)-Br(11)  | 2.8912(8) |
| Pb(1)-Br(7)   | 3.0195(8)  | Pb(4)-Br(8)   | 2.9728(8) |
| Pb(1)-Br(13)  | 3.0231(8)  | Pb(4)-Br(2)#1 | 3.1096(8) |
| Pb(1)-Br(9)   | 3.0345(8)  | Pb(5)-Br(4)   | 2.7310(8) |
| Pb(1)-Br(5)   | 3.2265(8)  | Pb(5)-Br(6)#2 | 3.0218(8) |
| Pb(2)-Br(3)   | 2.8709(9)  | Pb(5)-Br(11)  | 3.0663(8) |
| Pb(2)-Br(7)   | 2.9021(8)  | Pb(5)-Br(12)  | 3.0886(8) |
| Pb(2)-Br(2)   | 2.9948(8)  | Pb(5)-Br(3)#3 | 3.1266(9) |
| Pb(2)-Br(6)#1 | 3.1599(8)  | Co(1)-N(4)    | 1.918(5)  |
| Pb(2)-Br(13)  | 3.1971(8)  | Co(1)-N(1)    | 1.922(5)  |
| Pb(3)-Br(1)   | 2.7215(10) | Co(1)-N(5)    | 1.923(5)  |
| Pb(3)-Br(8)   | 2.9239(8)  | Co(1)-N(3)    | 1.925(5)  |
| Pb(3)-Br(9)#1 | 2.9921(8)  | Co(1)-N(2)    | 1.933(5)  |
| Pb(3)-Br(10)  | 3.1735(8)  | Co(1)-N(6)    | 1.936(5)  |

Symmetry transformations used to generate equivalent atoms: #1  $x, -y+1/2, z+1/2$ ; #2  $-x+1, -y+1, -z+1$ ; #3  $-x+1, y+1/2, -z+3/2$ .

**Table S7.** The hydrogen bonds in compounds **1-6**.

| D-H...A               | d(D-H) | d(H...A) | d(D...A) | <(DHA) |
|-----------------------|--------|----------|----------|--------|
| <b>1</b>              |        |          |          |        |
| C(4)-H(4)···Br(1)     | 0.93   | 3.014    | 3.652    | 127.15 |
| C(14)-H(14)···Br(4)   | 0.93   | 2.837    | 3.587    | 138.57 |
| C(24)-H(24)···Br(4)   | 0.93   | 2.758    | 3.493    | 136.88 |
| C(7)-H(7)···Br(6)     | 0.93   | 2.850    | 3.583    | 136.70 |
| C(12)-H(12)···Br(7)   | 0.93   | 2.781    | 3.563    | 142.39 |
| C(29)-H(29)···Br(7)   | 0.93   | 2.906    | 3.683    | 141.96 |
| <b>2</b>              |        |          |          |        |
| C(3)-H(3)···Br(2)     | 0.93   | 2.90     | 3.7901   | 160    |
| C(10)-H(10)···Br(4)   | 0.93   | 2.85     | 3.3446   | 114    |
| <b>3</b>              |        |          |          |        |
| C(32)-H(32)···Br(6)   | 0.93   | 2.86     | 3.7460   | 159    |
| C(47)-H(47)···Br(7)   | 0.93   | 2.87     | 3.5815   | 135    |
| C(52)-H(52)···Br(10)  | 0.93   | 2.72     | 3.5517   | 149    |
| C(65)-H(65)···Br(9)   | 0.93   | 2.81     | 3.6733   | 154    |
| <b>4</b>              |        |          |          |        |
| C(1) -H(1)···Br(4)    | 0.93   | 2.82     | 3.5533   | 137    |
| C(26) -H(26)···Br(8)  | 0.93   | 2.82     | 3.6687   | 153    |
| C(40) -H(40)···Br(2)  | 0.93   | 2.73     | 3.5929   | 154    |
| C(43) -H(43)···Br(10) | 0.93   | 2.93     | 3.7900   | 154    |
| <b>5</b>              |        |          |          |        |
| C(1) -H(1)···Br(3)    | 0.93   | 2.90     | 3.6357   | 137    |
| C(13) -H(13)···Br(5)  | 0.93   | 2.85     | 3.7183   | 156    |
| C(14) -H(14)···Br(8)  | 0.93   | 2.90     | 3.6212   | 135    |
| C(23) -H(23)···Br(7)  | 0.93   | 2.91     | 3.6341   | 135    |
| C(28) -H(28)···Br(3)  | 0.93   | 2.66     | 3.5814   | 171    |
| C(30) -H(30)···Br(1)  | 0.93   | 2.90     | 3.5405   | 127    |
| <b>6</b>              |        |          |          |        |
| C(4) -H(4)···Br(13)   | 0.93   | 2.81     | 3.4706   | 129    |
| C(12) -H(12)···Br(4)  | 0.93   | 2.85     | 3.6962   | 151    |
| C(17) -H(17)···Br(12) | 0.93   | 2.90     | 3.6613   | 140    |
| C(28) -H(28)···Br(7)  | 0.93   | 2.74     | 3.5688   | 149    |

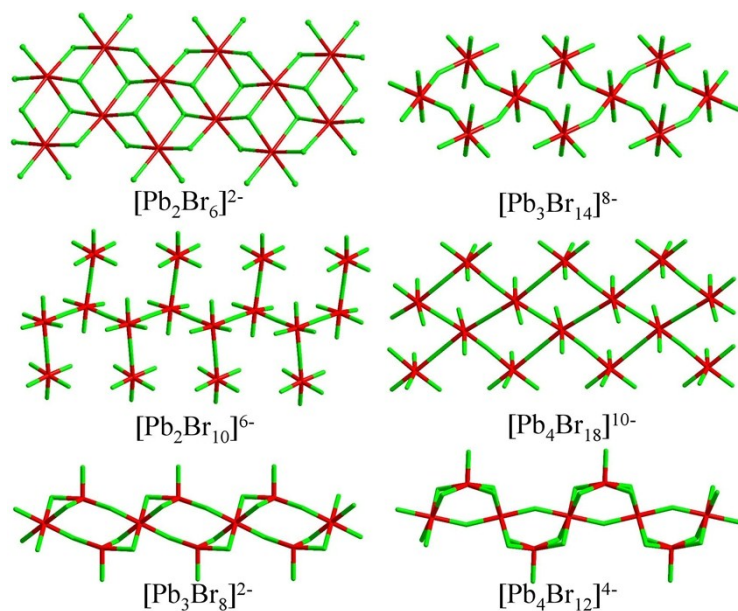

**Figure S1.** The variation of the partial structural motifs of the 1D Pb-Br chains directed by various organic cations.

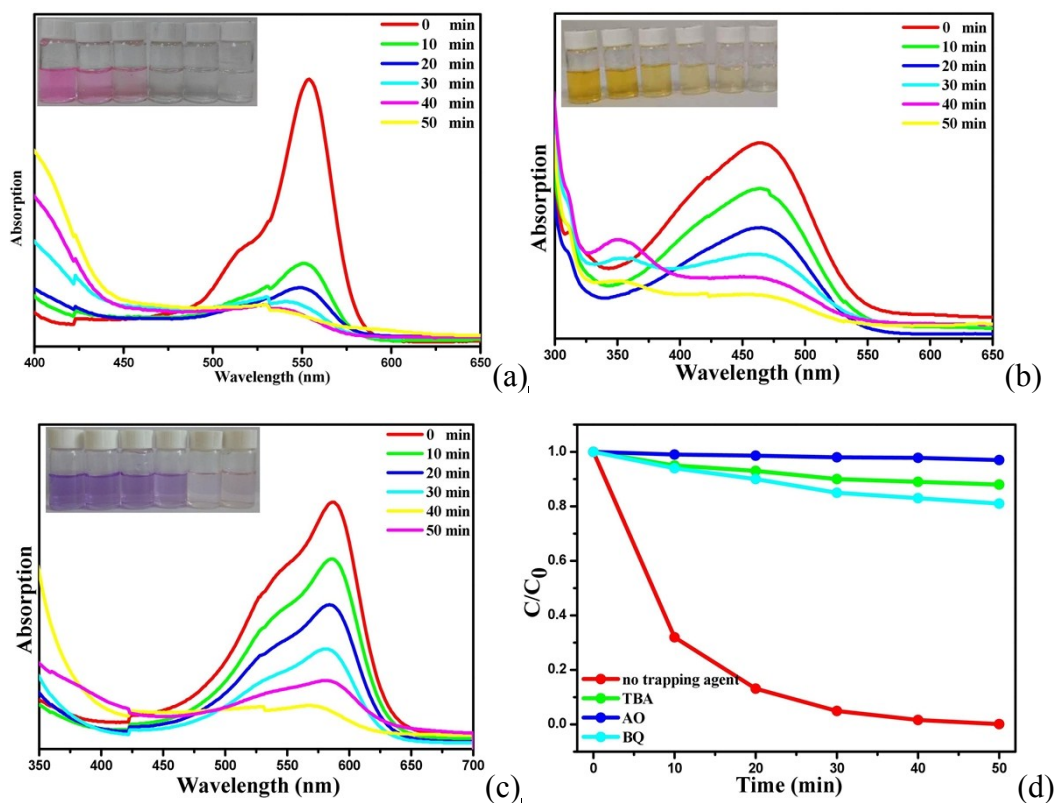

**Figure S2.** Absorption spectra of a solution of RhB (a), MO (b) and CV (c) in the presence of compound 6 under exposure to visible light irradiation. The time dependent photocatalytic degradation of CV under the radical-trapping scavengers over sample 6 (d).

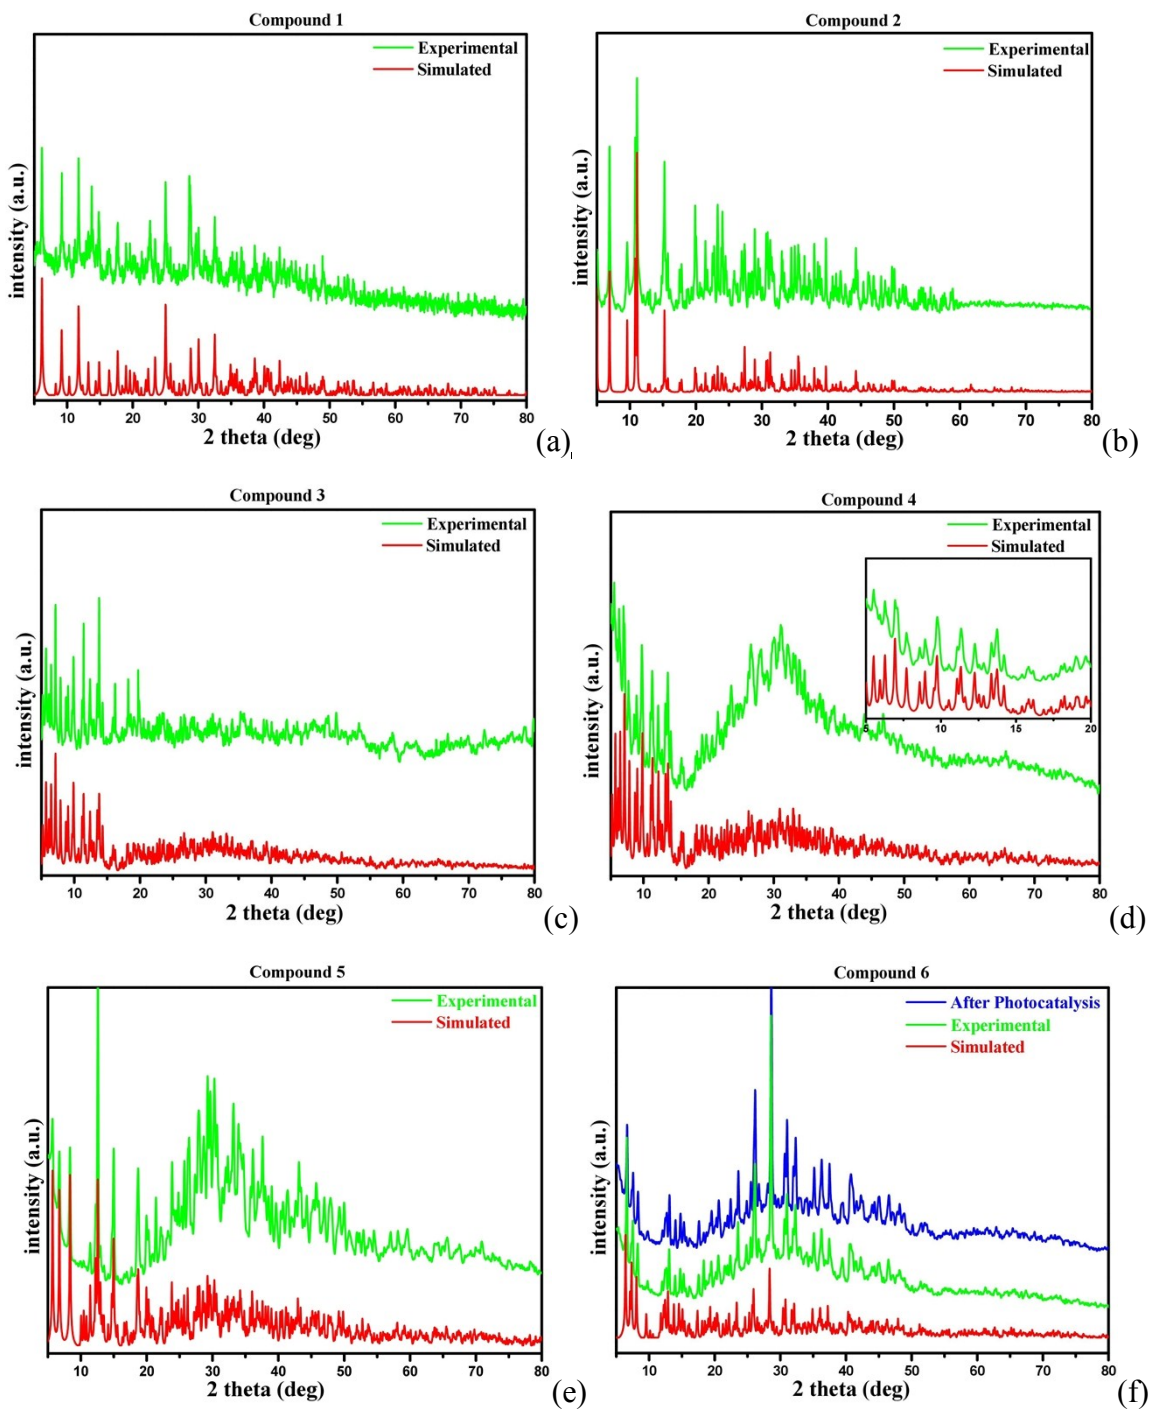

**Figure S3.** The simulated and experimental XRD patterns of compounds 1-6.

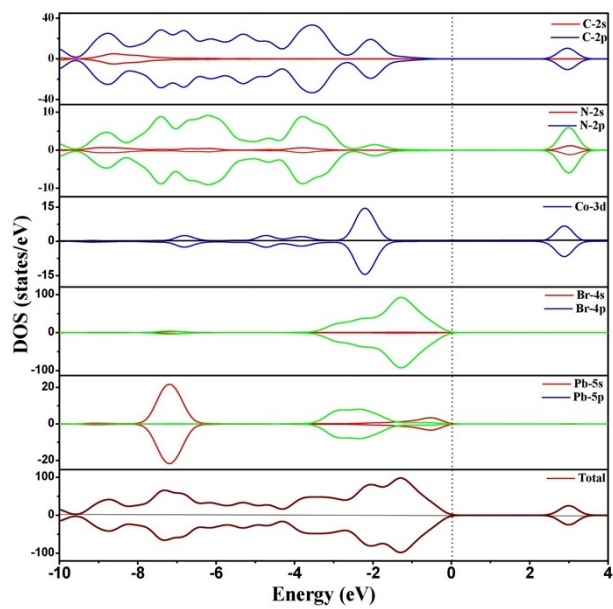

**Figure S4.** The total and partial DOS of compound **6**.
